# Supplementary material for: Colonoscopic titanium clipping to address appendiceal stump leakage: a case report
Source: PubMed Central journal article supplement (PMC10394468; doi:10.3389/fsurg.2023.1171875), 2023-07-19

**Supplementary Figure S1A** Red circles show the extent and size of the iliopsoas abscess alphabetically.

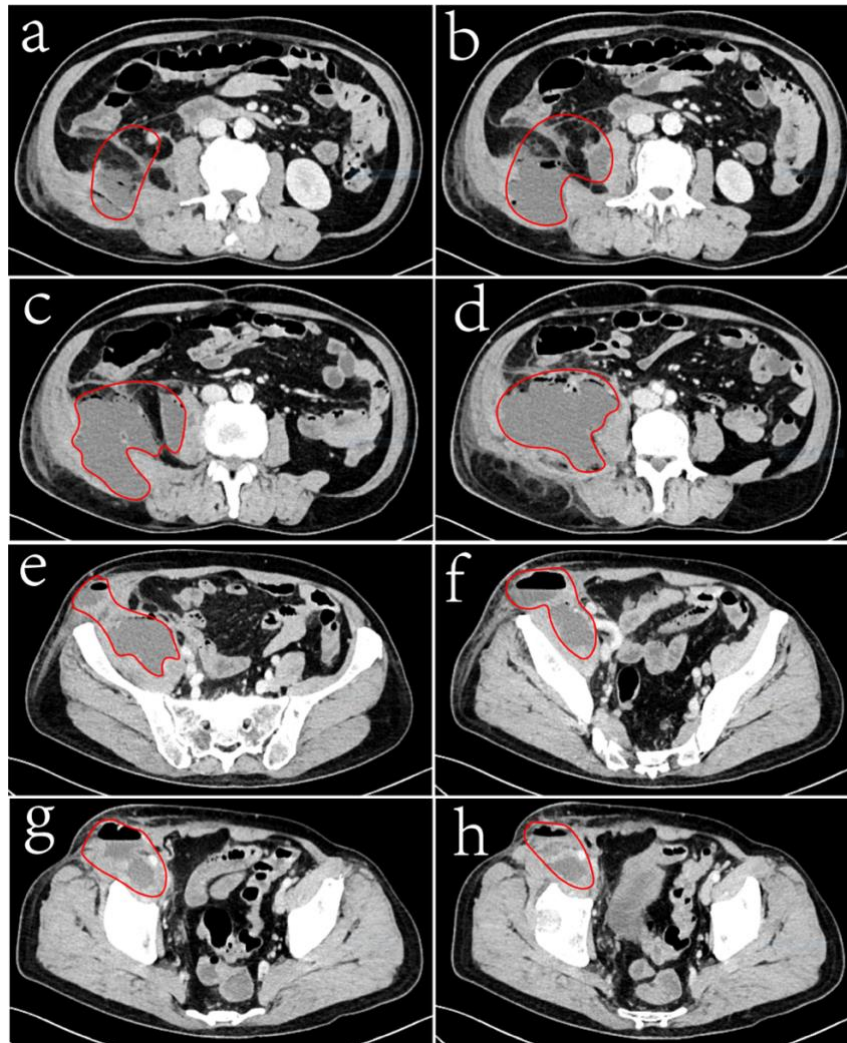

**Supplementary Figure S1B** Colonic barium enema shows no contrast medium spillage from the appendiceal stump in alphabetical order.

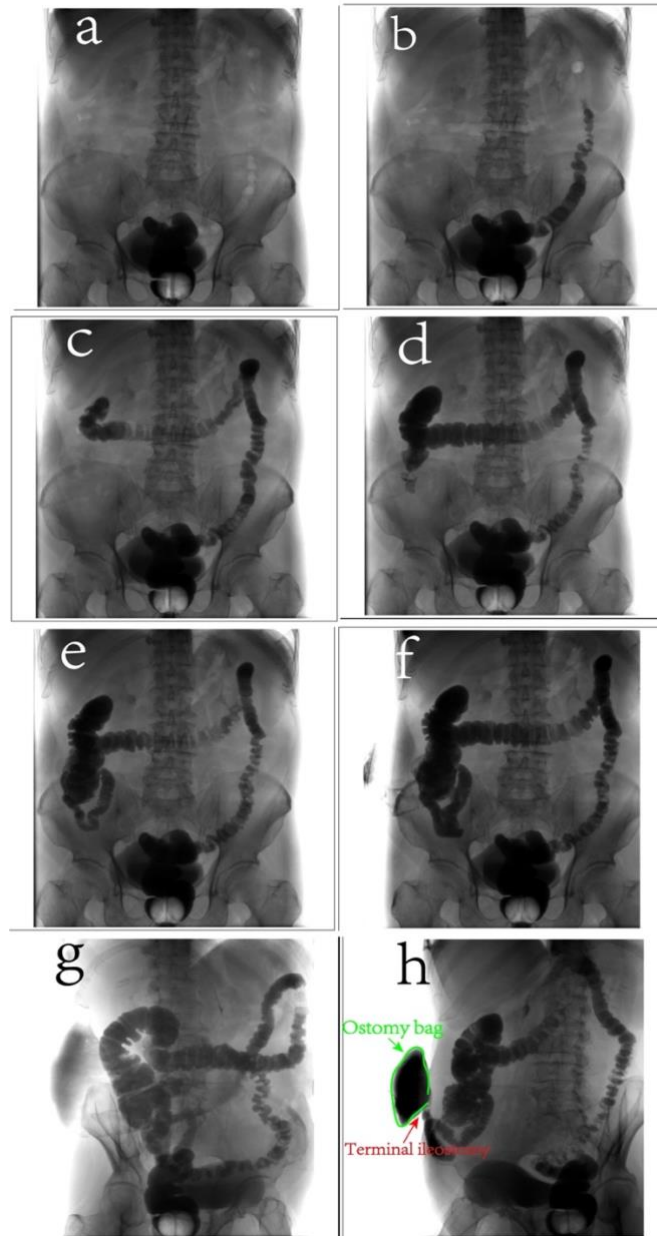

Supplement: Datasheet1.pdf [file Datasheet1.pdf]
