# Supplementary material for: Colonoscopic titanium clipping to address appendiceal stump leakage: a case report
Source: PubMed Central journal article supplement (PMC10394468; doi:10.3389/fsurg.2023.1171875), 2023-07-19

**Supplementary Figure S2A** Red circles represent the encapsulated iliac fossa abscess around the ASL in alphabetical order. Green circles show the titanium staples on the ileal anastomosis.

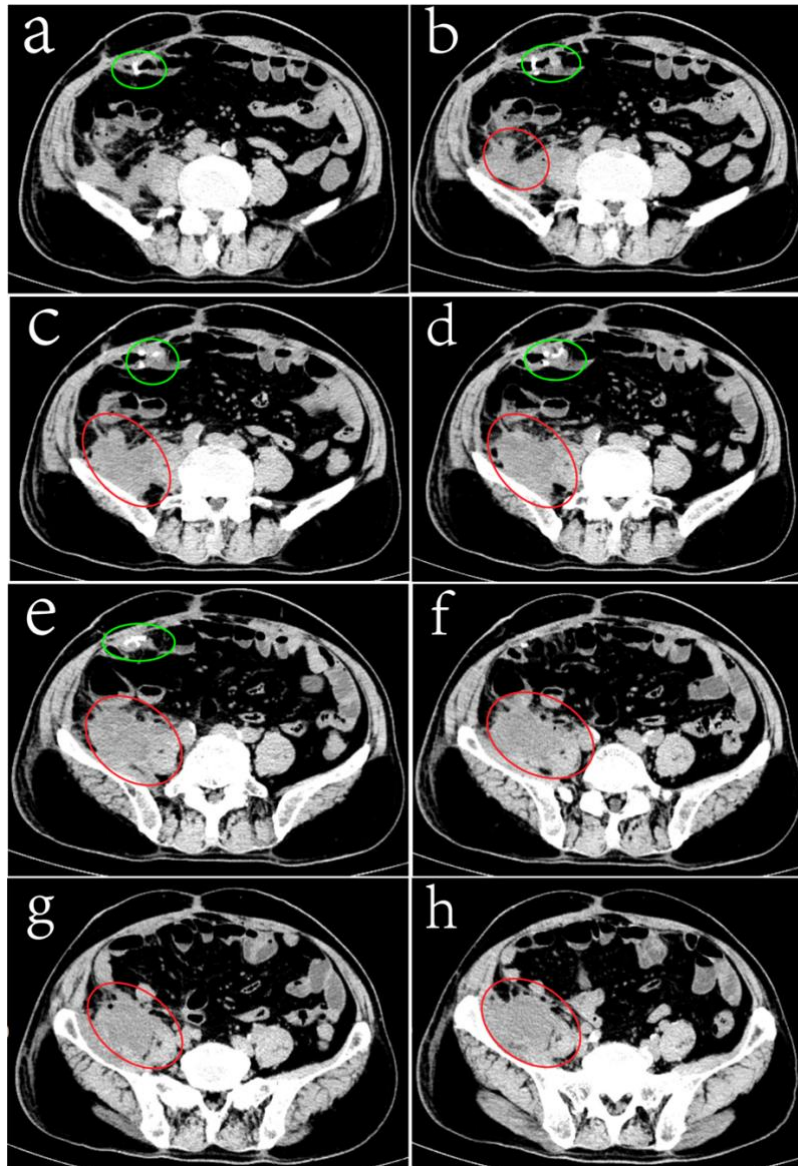

**Supplementary Figure S2B** Blue circles show the titanium clips on the appendiceal orifice. Green circles show the ileal anastomosis. The red arrows show the path of the J catheter alphabetically.

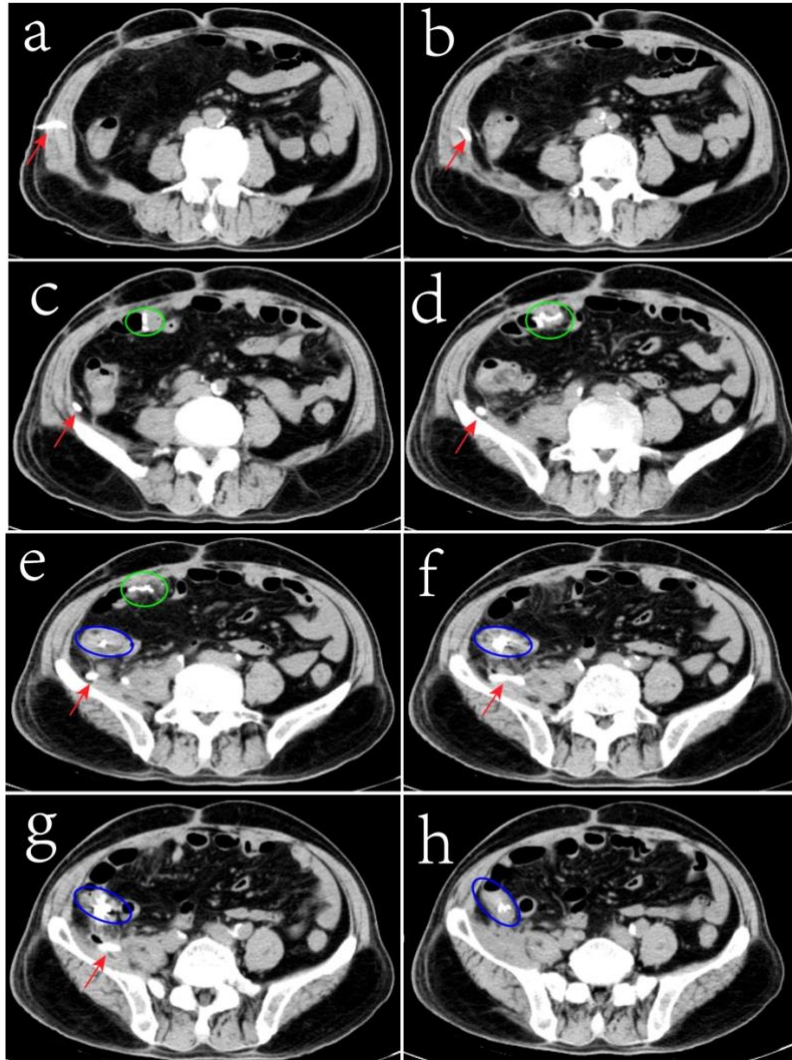

Supplement: Datasheet2.pdf [file Datasheet2.pdf]
